# Supplementary material
Source: HighWire-hosted journal article supplement (https://bmjopenquality.bmj.com/content/5/1/u210921.w5756)

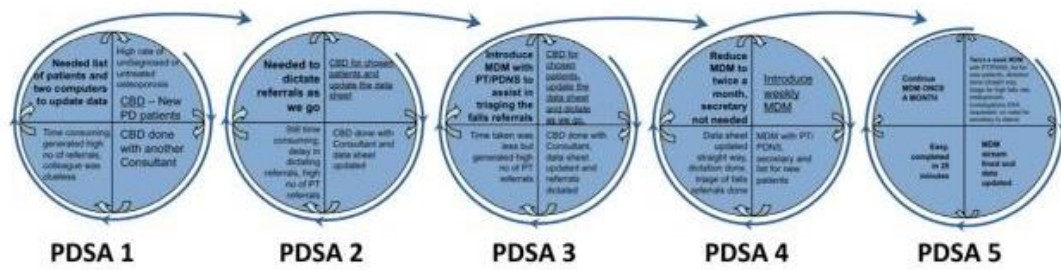

Figure 2 (Supplementary) - PDSA cycles 1-5

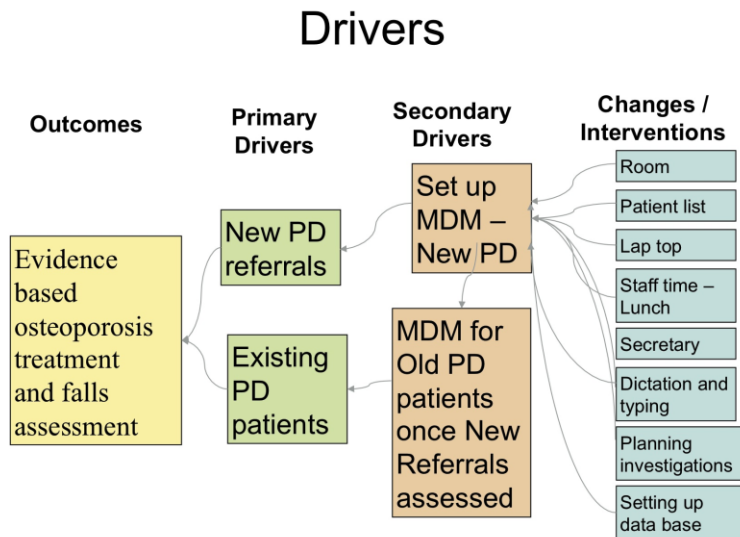

Figure 3 (supplementary) - Drivers for change

Supplement: inline-supplementary-material-1 [file inline-supplementary-material-1.pdf]
